# Supplementary material for: In Situ Fluorescent Illumination of Microplastics in Water Utilizing a Combination of Dye/Surfactant and Quenching Techniques
Source: MDPI journal article supplement (doi:10.3390/polym14153084), 2022-07-29
Supplement: s1 [file s1]

# Supplementary Material: In Situ Fluorescent Illumination of Microplastics in Water Utilizing a Combination of Dye/Surfactant and Quenching Techniques

Doo Hong Park, Se Bin Oh and Sung Chul Hong \*

Table S1. Examples of MP staining methods.

| Polymer type <sup>a</sup> | shape            | Size range (μm) | Dye                 | Solvent         | Excitation wavelength (nm) | Emission wavelength (nm) | Reference |
|---------------------------|------------------|-----------------|---------------------|-----------------|----------------------------|--------------------------|-----------|
| PS                        | Fragment, sphere | 13.5 ~ 300      | iDye Poly(Jacquard) | Deionized water | 531                        | 593                      | [1]       |
|                           | Fragment         | -               | Nile red            | Acetone         | 450~510                    | 529                      | [2]       |
|                           | Fragment         | 300 ~ 5000      | Nile red            | Chloroform      | 365                        | 445                      | [3]       |
|                           | Granule          |                 |                     | Acetone         |                            |                          |           |
|                           | Fragment         | 63 ~ 630        | Nile red            | n-Hexane        | 365                        | 445                      | [4]       |
|                           | Fragment         | 24 ~ 196        | Nile red            | Chloroform      | 460                        | 525                      | [5]       |
|                           | Bead             | 0.05 ~ 0.1      | Nile red            | Methanol        | 623                        | 660                      | [6]       |
|                           | Fragment         | ~ 100           | Nile red            | Methanol        | 460                        | 543                      | [7]       |
|                           | Fragment         | ~ 100           | FITC                | Methanol        | 488                        | -                        | [7]       |
|                           | Fragment         | ~ 100           | Safranine T         | Methanol        | 520                        | -                        | [7]       |
| LDPE                      | Fragment         | -               | DAPI                | Water           | 355 ~ 405                  | 420 ~ 480                | [8]       |
|                           | Fragment         | 100 ~ 500       | Rhodamine B         | Ethanol         | 450 ~ 490                  | 515 ~ 565                | [9]       |
|                           | Fragment         | 100 ~ 500       | iDye Poly(Jacquard) | Deionized water | 531                        | 593                      | [1]       |
|                           | Fragment         | 300 ~ 5000      | Nile red            | Chloroform      | 365                        | 445                      | [3]       |
|                           | Granule          |                 |                     | Acetone         |                            |                          |           |
|                           | Fragment         |                 | Nile red            | n-Hexane        | 440~520                    | 535                      | [10]      |
|                           | Fragment         | ~ 300           | Nile red            | Acetone         | 534 ~ 558                  | 515 ~ 565, 590 ~         | [11]      |
|                           | Sphere           | 10 ~ 90         | iDye Poly(Jacquard) | Deionized water | 531                        | 593                      | [1]       |
|                           |                  | 300 ~ 5000      | Nile red            | Chloroform      | 365                        | 445                      | [3]       |
|                           |                  |                 | Nile red            | Acetone         | 440~520                    | 535                      | [10]      |
|                           |                  | 300 ~ 1000      | Nile red            | n-Hexane        | 460                        | 525                      | [12]      |
| HDPE                      | Fragment         | 80 ~ 200        | Nile red            | Methanol        | 534 ~ 558                  | 515 ~ 565, 590 ~         | [11]      |
|                           | Fragment         | 500 ~ 4000      | iDye Poly(Jacquard) | Deionized water | 531                        | 593                      | [1]       |
|                           | Fragment         | -               | Nile red            | Acetone         | 450~510                    | 529                      | [2]       |
|                           | Fragment         | 300 ~ 5000      | Nile red            | Chloroform      | 365                        | 445                      | [3]       |
|                           | Granule          |                 |                     | Acetone         |                            |                          |           |
|                           | Fragment         |                 | Nile red            | n-Hexane        | 440~520                    | 535                      | [10]      |
|                           | Fragment         | 63 ~ 630        | Nile red            | Acetone         | 460                        | 525                      | [12]      |
|                           | Fragment         | 300 ~ 1000      | Nile red            | Chloroform      | 460                        | 525                      | [5]       |
|                           | Fragment         | 20 ~ 130        | Nile red            | Methanol        | 460                        | 525                      | [5]       |
|                           | Fragment         | ~ 300           | Nile red            | n-Hexane        | 534 ~ 558                  | 515 ~ 565, 590 ~         | [11]      |
| PP                        | Fragment         | -               | DAPI                | Water           | 355 ~ 405                  | 420 ~ 480                | [8]       |
|                           | Fragment         | 400 ~ 1000      | Rhodamine B         | Ethanol         | 450 ~ 490                  | 515 ~ 565                | [9]       |
|                           | Fragment         | 30 ~ 5000       | iDye Poly(Jacquard) | Deionized       | 531                        | 593                      | [1]       |
|                           | Fragment         | 500 ~ 4000      | iDye Poly(Jacquard) | Deionized water | 531                        | 593                      | [1]       |
|                           |                  | -               | Nile red            | Acetone         | 450~510                    | 529                      | [2]       |
|                           |                  | 300 ~ 5000      | Nile red            | Chloroform      | 365                        | 445                      | [3]       |
|                           |                  |                 | Nile red            | Acetone         | 440~520                    | 535                      | [10]      |
|                           | Fragment         | 63 ~ 630        | Nile red            | n-Hexane        | 365                        | 445                      | [4]       |
|                           | Fragment         | 300 ~ 1000      | Nile red            | Acetone         | 460                        | 525                      | [12]      |
|                           | Fragment         | 20 ~ 130        | Nile red            | Methanol        | 460                        | 525                      | [5]       |
| PET                       | Fragment         | ~ 300           | Nile red            | n-Hexane        | 534 ~ 558                  | 515 ~ 565, 590 ~         | [11]      |
|                           | Fragment         | -               | DAPI                | Water           | 355 ~ 405                  | 420 ~ 480                | [8]       |

| fiber   |          |            |                     | water           |           |                     |      |
|---------|----------|------------|---------------------|-----------------|-----------|---------------------|------|
|         | Fiber    | 300 ~ 5000 | Nile red            | Chloroform      |           |                     |      |
|         |          |            |                     | Acetone         | 365       | 445                 | [3]  |
|         | Fragment | -          | Nile red            | n-Hexane        |           |                     |      |
|         | Fiber    | 63 ~ 630   | Nile red            | Acetone         | 450~510   | 529                 | [2]  |
|         | Fragment | ~ 300      | Nile red            | Chloroform      | 365       | 445                 | [4]  |
|         | Fragment | -          | Nile red            | Methanol        | 460       | 525                 | [5]  |
|         | Fragment | ~ 200      | Nile red            | n-Hexane        | 365       | 445                 | [11] |
|         | Fragment | ~ 200      | FITC                | Methanol        | 460       | 543                 | [7]  |
|         | Fragment | ~ 200      | Safranin T          | Methanol        | 488       | -                   | [7]  |
|         | Fragment | ~ 200      |                     | Methanol        | 520       | -                   | [7]  |
| PVC     | Fragment | 50 ~ 300   | iDye Poly(Jacquard) | Deionized water | 531       | 593                 | [1]  |
|         | Fragment | 80 ~ 148   | Nile red            | Methanol        | 460       | 525                 | [5]  |
|         | Fragment |            | Nile red            | n-Hexane        | 534 ~ 558 | 515 ~ 565,<br>590 ~ | [11] |
|         | Fragment | ~ 100      | Nile red            | Methanol        | 460       | 543                 | [7]  |
|         | Fragment | ~ 100      | FITC                | Methanol        | 488       | -                   | [7]  |
|         | Fragment | ~ 100      | Safranin T          | Methanol        | 520       | -                   | [7]  |
|         | Fragment | -          | DAPI                | Water           | 355 ~ 405 | 420 ~ 480           | [8]  |
|         | Fragment | 50 ~ 200   | Rhodamine B         | Ethanol         | 450 ~ 490 | 515 ~ 565           | [9]  |
| PAN     | Fiber    | 20 ~ 3000  | iDye Poly(Jacquard) | Deionized water | 531       | 593                 | [1]  |
|         | Fragment | 63 ~ 630   | Nile red            | Chloroform      | 365       | 445                 | [4]  |
| PE      | Fragment | -          | Nile red            | Acetone         | 450~510   | 529                 | [2]  |
|         | Fragment | 63 ~ 630   | Nile red            | Chloroform      | 365       | 445                 | [4]  |
|         | Fragment | 40 ~ 48    | Nile red            | Methanol        | 460       | 525                 | [5]  |
|         | Fragment | 40 ~ 46    | Nile red            | Methanol        | 460       | 525                 | [13] |
|         | Fragment | 100 ~ 300  | Rhodamine B         | Ethanol         | 450 ~ 490 | 515 ~ 565           | [9]  |
| Nylon 6 | Fragment | -          | Nile red            | Acetone         | 450~510   | 529                 | [2]  |
|         | Fragment | 63 ~ 91    | Nile red            | Methanol        | 460       | 525                 | [5]  |
| PA      | Fragment | 63 ~ 630   | Nile red            | Chloroform      | 365       | 445                 | [4]  |
|         | Fiber    | -          | Nile red            | n-Hexane        | 365       | 445                 | [11] |
|         | Fiber    | -          | DAPI                | Water           | 355 ~ 405 | 420 ~ 480           | [8]  |
| PC      | Fragment | 94 ~ 169   | Nile red            | Methanol        | 460       | 525                 | [5]  |
|         | Fragment | 71 ~ 154   | Nile red            | Methanol        | 460       | 525                 | [5]  |
| PU      | Fragment | ~ 100      | Nile red            | n-Hexane        | 534 ~ 558 | 515 ~ 565,<br>590 ~ | [11] |
|         | Fragment | 50 ~ 300   | Rhodamine B         | Ethanol         | 450 ~ 490 | 515 ~ 565           | [9]  |
| EPS     | Fragment | ~ 300      | Nile red            | n-Hexane        | 534 ~ 558 | 515 ~ 565,<br>590 ~ | [11] |

<sup>a</sup> Abbreviations of polymers: Polystyrene, PS; Polyethylene, PE; high-density polyethylene, HDPE; low-density polyethylene, LDPE; polypropylene, PP; poly(ethylene terephthalate), PET; poly(vinyl chloride), PVC; polyacrylonitrile, PAN; polyamide, PA; polycarbonate, PC; polyurethane, PU; expanded polystyrene, EPS.

**Table S2.** Representative density and fusion temperature values of common MPs [1,14-22].

| Type | Composition                                     | Density range (g/cm <sup>3</sup> ) | Representative density (average, g/cm <sup>3</sup> ) | Thermal event for fusion <sup>a</sup> | Fusion temperature (°C) | Representative fusion temperature (average, °C) |
|------|-------------------------------------------------|------------------------------------|------------------------------------------------------|---------------------------------------|-------------------------|-------------------------------------------------|
| PP   | isotactic PP                                    | 0.90 ~ 0.91                        | 0.92                                                 | T <sub>m</sub>                        | ~ 186                   | 156                                             |
|      | syndiotactic PP                                 | 0.90 ~ 0.95                        |                                                      | T <sub>m</sub>                        | 125 ~ 130               |                                                 |
| PE   | High density PE (HDPE)                          | 0.94 ~ 0.96                        | 0.93                                                 | T <sub>m</sub>                        | 125                     | 120                                             |
|      | Low density PE (LDPE)                           | 0.91 ~ 0.93                        |                                                      | T <sub>m</sub>                        | 130                     |                                                 |
|      | Linear low density PE (LLDPE)                   | 0.91 ~ 0.93                        |                                                      | T <sub>m</sub>                        | 105 ~ 125               |                                                 |
|      | Very low density PE (VLDPE)                     | 0.90                               |                                                      | T <sub>m</sub>                        | 110                     |                                                 |
| PS   | General purpose PS                              | 1.03 ~ 1.05                        | 1.09                                                 | T <sub>g</sub>                        | 90 ~ 100                | 100                                             |
|      | Styrene-acrylonitrile copolymer (SAN)           | 1.07 ~ 1.09                        |                                                      | T <sub>g</sub>                        | 103 ~ 109               |                                                 |
|      | Acrylonitrile-butadiene-styrene copolymer (ABS) | 1.01 ~ 1.8                         |                                                      | T <sub>g</sub>                        | 104                     |                                                 |

<sup>a</sup> T<sub>m</sub> = melting temperature, T<sub>g</sub> = glass transition temperature.

**Table S3.** Comparison between recent prices of dye candidates to stain MPs <sup>a</sup>.

| Dye                                                                              | Source         | Cost (KRW/g) | Cost (USD/g) |
|----------------------------------------------------------------------------------|----------------|--------------|--------------|
| Nile red                                                                         | Sigma Aldrich  | 981,976      | 792.28       |
| S-FN                                                                             | Yedam chemical | 149          | 0.12         |
| Fluorescein isothiocyanate (FITC)                                                | Sigma Aldrich  | 369,214      | 297.89       |
| 4,5,6,7-Tetrachloro-2',4',5',7'-tetraiodofluorescein disodium salt (Rose Bengal) | Sigma Aldrich  | 67,512       | 54.47        |

<sup>a</sup> 1 USD = 1,239 KRW on April 22th, 2022.

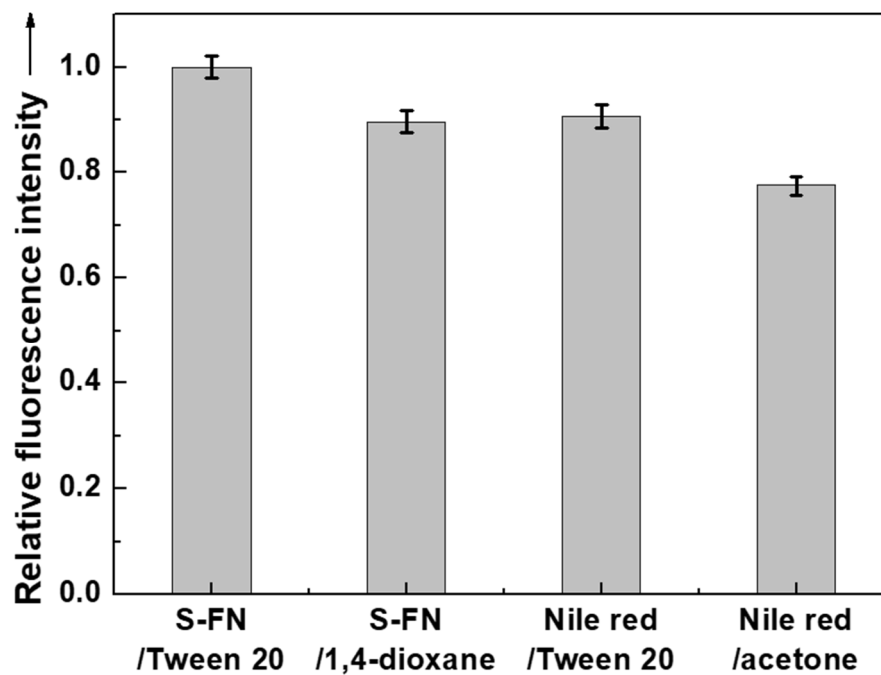

**Figure S1.** Relative fluorescence intensity of PP-MPs stained with S-FN and Nile red with Tween 20 and different solvents. Staining conditions: dye/surfactant or solvent = 1 g/L, dye/MP = 2.5 wt%, MP/water solution = 1 g/L, staining time = 60 minutes, staining temperature = 80 °C.

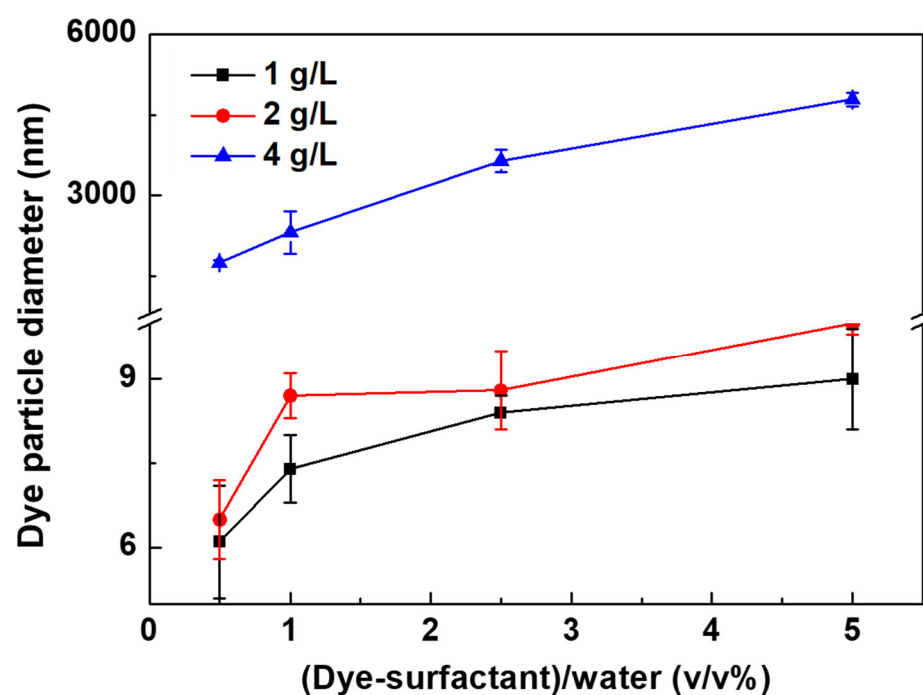

**Figure S2.** Size of the dye particles with different dye/surfactant ratios at various S-FN/Tween 20 concentrations in water.

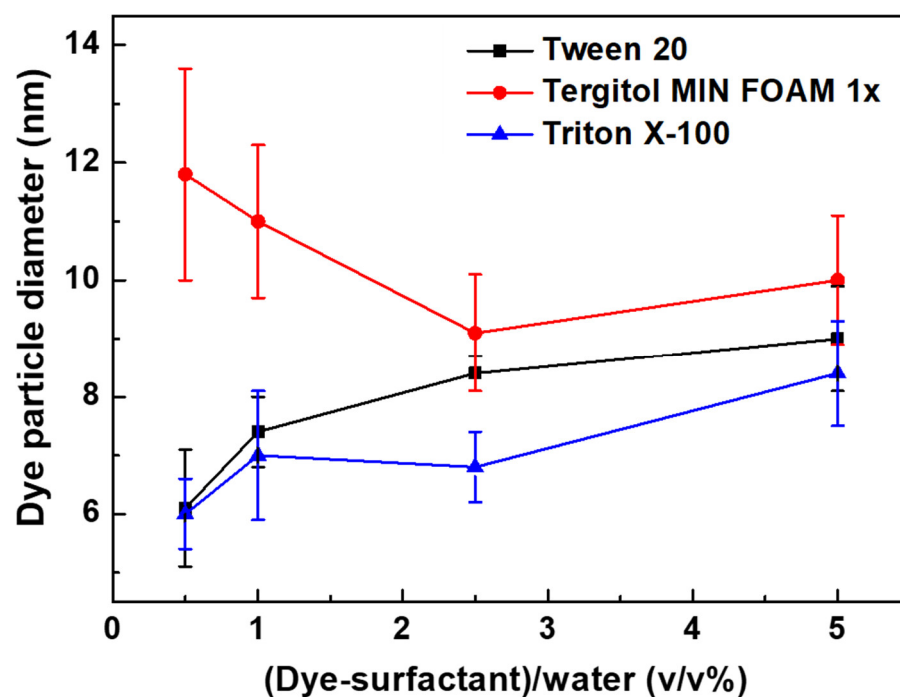

**Figure S3.** Size of the dye particles with different surfactants at various S-FN concentrations in water (dye/surfactant = 1 g/L).

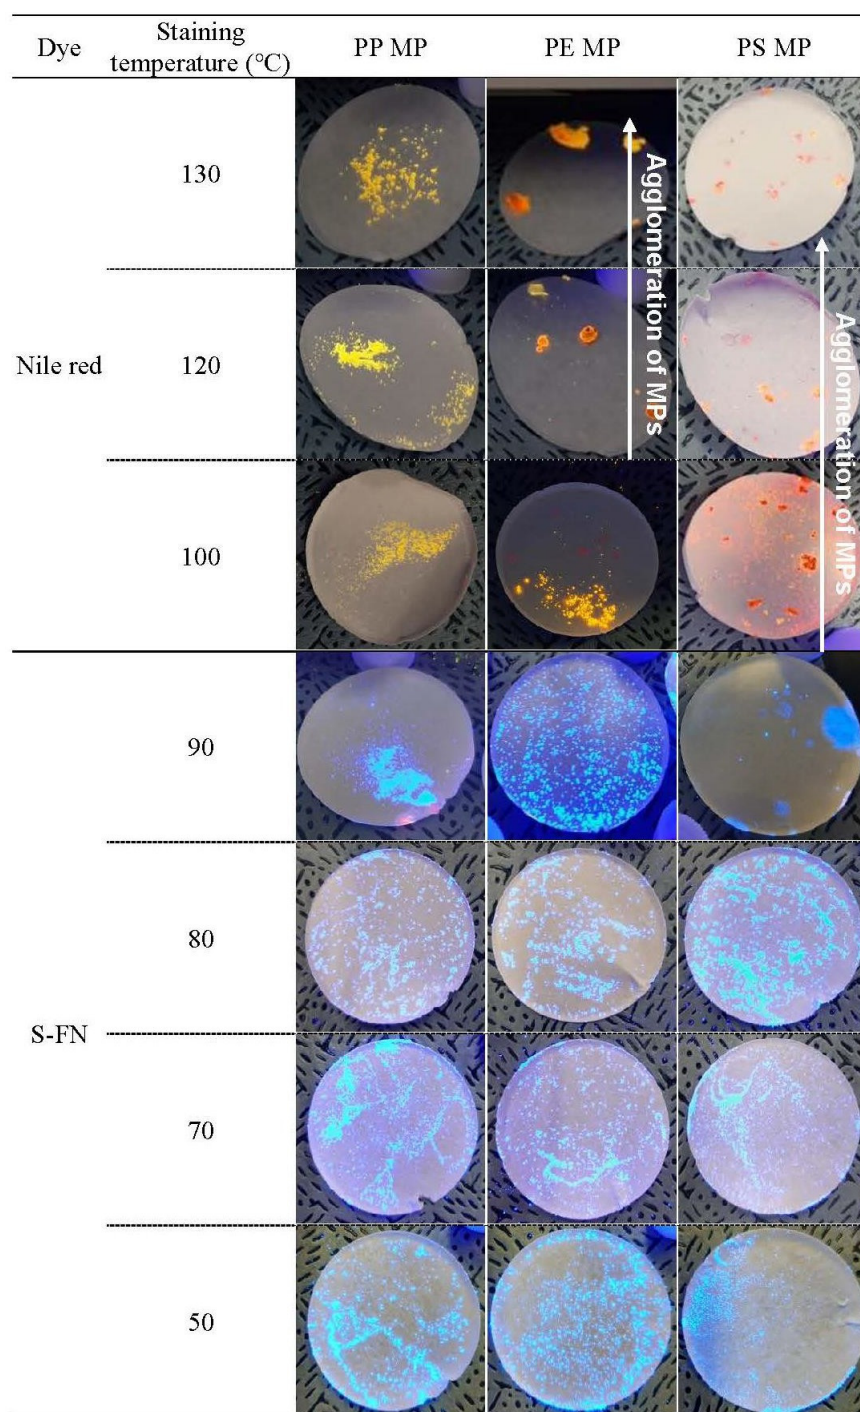

**Figure S4.** Optical photographs of different stained MPs at different staining temperatures (illumination by UV Hand Lamp at 254 nm for MPs stained with Nile red and 365 nm for MPs stained with S-FN). Staining conditions: surfactant = Tween 20, dye/surfactant = 1 g/L, dye/MP = 2.5 wt%, MP/aqueous solution = 1 g/L, staining time = 60 minutes.

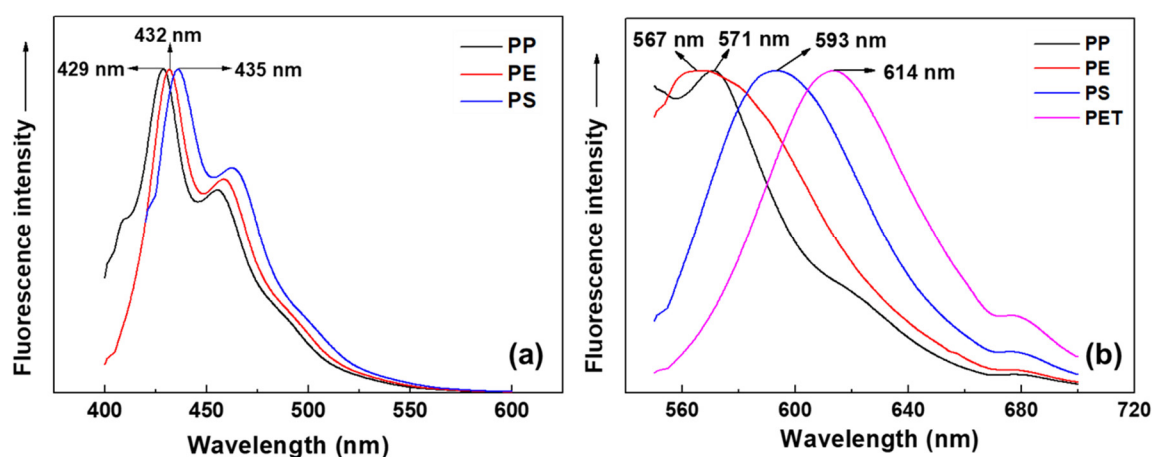

**Figure S5.** Normalized fluorescence spectra of S-FN (a) and Nile red (b) in stained MPs. Staining conditions: surfactant = Tergitol MIN FOAM 1x, dye/surfactant = 1 g/L, dye/MP = 2.5 wt%, MP/aqueous solution = 1 g/L, staining time = 60 minutes, staining temperature = 80 °C.

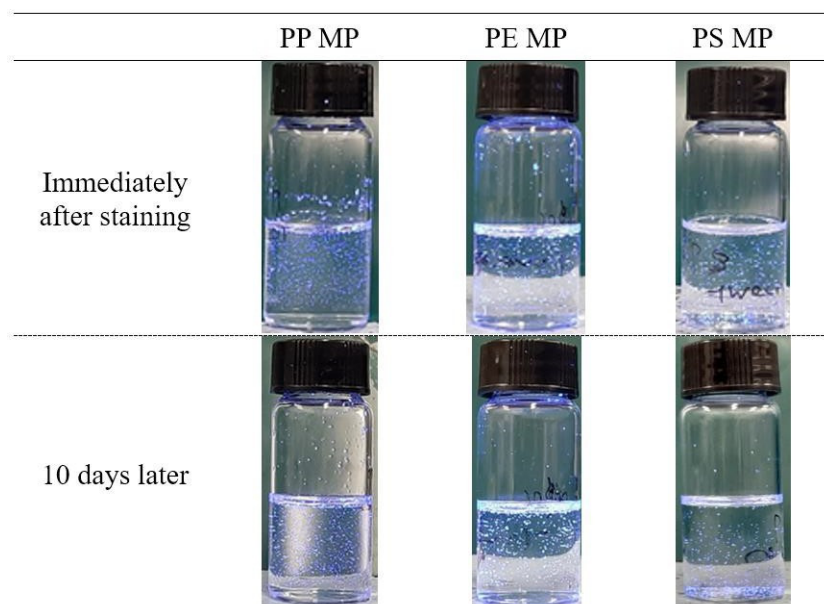

**Figure S6.** Optical photographs of stained MPs after removing the staining solution and redispersing the MPs in a water/ethanol solution (illuminated by UV Hand Lamp at 365 nm). Staining conditions: dye = S-FN, surfactant = Tween 20, dye/surfactant = 1 g/L, dye/MP = 2.5 wt%, MP/aqueous solution = 1 g/L, staining time = 60 minutes, staining temperature = 80 °C.

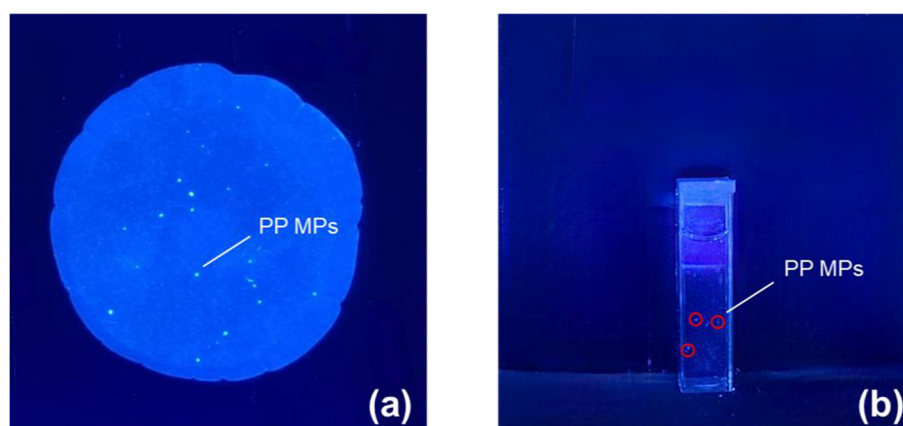

**Figure S7.** Optical photographs of PP MPs stained at an MP/aqueous solution concentration of  $3.5 \times 10^{-2}$  g/L: Filtered PP MPs (a) and redispersed PP MPs in aqueous solution (b) after staining (illuminated by UV Hand Lamp at 365 nm). Staining conditions: dye = S-FN, surfactant = Tween 20, dye/surfactant = 1 g/L, dye/MP = 2.5 wt%, MP/aqueous solution =  $3.5 \times 10^{-2}$  g/L, staining time = 60 minutes, staining temperature = 80 °C.

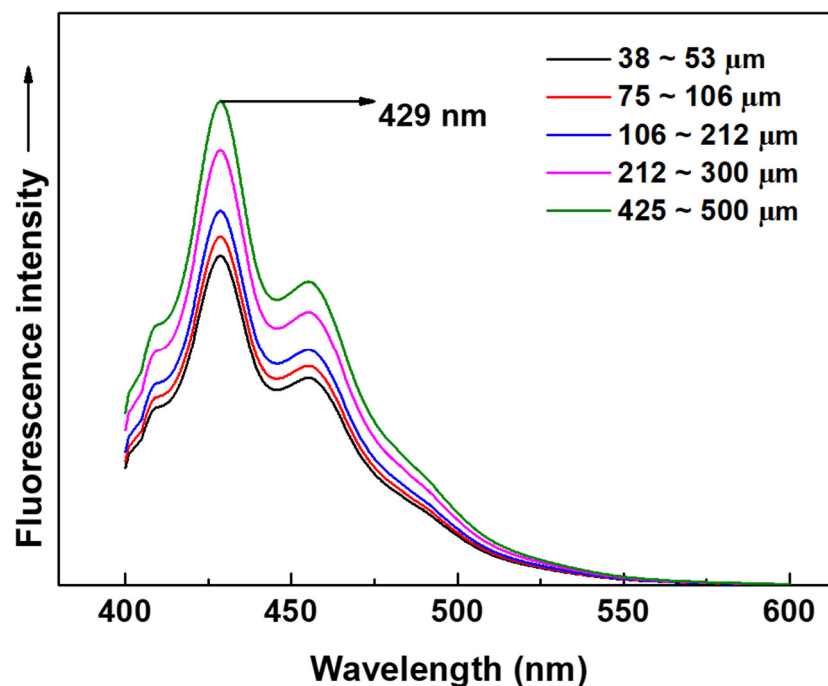

**Figure S8.** Fluorescence spectra of PP MPs with different sizes stained with S-FN/Tween 20. Staining conditions: dye/surfactant = 1 g/L, dye/MP = 2.5 wt%, MP/aqueous solution = 1 g/L, staining time = 60 minutes, staining temperature = 80 °C.

## References

1. Karakolis, E.G.; Nguyen, B.; You, J.B.; Rochman, C.M.; Sinton, D. Fluorescent dyes for visualizing microplastic particles and fibers in laboratory-based studies. *Environ. Sci. Technol. Lett.* **2019**, *6*, 334-340.
2. Maes, T.; Jessop, R.; Wellner, N.; Haupt, K.; Mayes, A.G. A rapid-screening approach to detect and quantify microplastics based on fluorescent tagging with Nile Red. *Sci. Rep.* **2017**, *7*, 44501.
3. Tamminga, M.; Hengstmann, E.; Fischer, E.K. Nile Red staining as a subsidiary method for microplastic quantification: A comparison of three solvents and factors influencing application reliability. *SDRP J. Earth Sci. Environ. Studies* **2017**, *2*, 165-172.
4. Hengstmann, E.; Fischer, E.K. Nile red staining in microplastic analysis-proposal for a reliable and fast identification approach for large microplastics. *Environ. Monit. Assess.* **2019**, *191*, 612.
5. Erni-Cassola, G.; Gibson, M.I.; Thompson, R.C.; Christie-Oleza, J.A. Lost, but found with Nile red: A novel method for detecting and quantifying small microplastics (1 mm to 20 μm) in environmental samples. *Environ. Sci. Technol.* **2017**, *51*, 13641-13648.

6. Gagne, F.; Auclair, J.; Quinn, B. Detection of polystyrene nanoplastics in biological samples based on the solvatochromic properties of Nile red: application in *Hydra attenuata* exposed to nanoplastics. *Environ. Sci. Pollut. Res.* **2019**, *26*, 33524-33531.
7. Lv, L.; Qu, J.; Yu, Z.; Chen, D.; Zhou, C.; Hong, P.; Sun, S.; Li, C. A simple method for detecting and quantifying microplastics utilizing fluorescent dyes - Safranin T, fluorescein isophosphate, Nile red based on thermal expansion and contraction property. *Environ. Pollut.* **2019**, *255*, 113283.
8. Stanton, T.; Johnson, M.; Nathanail, P.; Gomes, R.L.; Needham, T.; Burson, A. Exploring the efficacy of Nile red in microplastic quantification: A costaining approach. *Environ. Sci. Technol. Lett.* **2019**, *6*, 606-611.
9. Tong, H.; Jiang, Q.; Zhong, X.; Hu, X. Rhodamine B dye staining for visualizing microplastics in laboratory-based studies. *Environ. Sci. Pollut. Res.* **2021**, *28*, 4209-4215.
10. Wiggan, K.J.; Holland, E.B. Validation and application of cost and time effective methods for the detection of 3-500  $\mu\text{m}$  sized microplastics in the urban marine and estuarine environments surrounding Long Beach, California. *Mar. Pollut. Bull.* **2019**, *143*, 152-162.
11. Shim, W.J.; Song, Y.K.; Hong, S.H.; Jang, M. Identification and quantification of microplastics using Nile Red staining. *Mar. Pollut. Bull.* **2016**, *113*, 469-476.
12. Tosic, T.N.; Vrugink, M.; Vesman, A. Microplastics quantification in surface waters of the Barents, Kara and White Seas. *Mar. Pollut. Bull.* **2020**, *161*, 111745.
13. Cook, S.; Chan, H.L.; Abolfathi, S.; Bending, G.D.; Schafer, H.; Pearson, J.M. Longitudinal dispersion of microplastics in aquatic flows using fluorometric techniques. *Water Res.* **2020**, *170*, 115337.
14. James, E. M., *Polymer Data Handbook*. Oxford University Press: New York, 1999.
15. Merrington, A., 11 - Recycling of Plastics. In *Applied Plastics Engineering Handbook*, Kutz, M., Ed. William Andrew Publishing: Oxford, 2011; pp 177-192.
16. Adachi, K.; Takahashi, T.; Kamehashi, K.; Watanabe, K.; Uchiyama, K.; Kuriyama, T.; Miyata, K.; Hisamastu, T. Thermal Effects on Ultrasonic Joining of Thin Plastic Films Using Torsional Vibrations. *Jpn. J. Appl. Phys.* **2008**, *47*, 6431-6436.
17. Gent, M.; Sierra, H.M.; Menendez, M.; de Cos Juez, F.J. Evaluation of ground calcite/water heavy media cyclone suspensions for production of residual plastic concentrates. *Waste Manag* **2018**, *71*, 42-51.
18. Liu, T.-W.; Youngstrom, C.R.; Agarwal, S.; Al-Mulla, A.; Gaggar, S.K.; Gupta, R.K., Novel Biomass-Based Non-Halogenated FR Styrenic Blends. In *Fire and Polymers VI: New Advances in Flame Retardant Chemistry and Science*, 2012; pp 151-165.
19. Andrady, A.L. Microplastics in the marine environment. *Mar. Pollut. Bull.* **2011**, *62*, 1596-1605.
20. Prata, J.C.; da Costa, J.P.; Duarte, A.C.; Rocha-Santos, T. Methods for sampling and detection of microplastics in water and sediment: A critical review. *Trends Anal. Chem.* **2019**, *110*, 150-159.
21. Andrady, A.L. The plastic in microplastics: A review. *Mar. Pollut. Bull.* **2017**, *119*, 12-22.
22. Hidalgo-Ruz, V.; Gutow, L.; Thompson, R.C.; Thiel, M. Microplastics in the marine environment: a review of the methods used for identification and quantification. *Environ. Sci. Technol.* **2012**, *46*, 3060-3075.
